# Supplementary material
Source: Elsevier journal article supplement (https://www.sciencedirect.com/science/article/pii/S2444440520300303)
Supplement: mmc1 [file S2444440520300303:mmc1.docx]

**Supplement**

**Search formulas:**

**PUBMED:**

("Rituximab"[All Fields] OR "pirfenidone"[All Fields] OR "tocilizumab"[All Fields] OR "fresolimumab"[All Fields] OR "nintedanib"[All Fields] OR "Mycophenolate mofetil"[All Fields] OR "Cyclophosphamide"[All Fields]) AND (("Scleroderma, Systemic"[Mesh] AND "Lung Diseases, Interstitial"[Mesh]) AND "2015/1/1"[PDAT] : "2019/7/31"[PDAT])

**EMBASE:**

('scleroderma'/exp OR 'systemic sclerosis'/exp) AND 'interstitial lung disease'/exp AND ('antifibrotic agent'/exp OR 'pirfenidone'/exp OR 'nintedanib'/exp OR 'cyclophosphamide'/exp OR 'mycophenolate mofetil'/exp OR 'rituximab'/exp OR 'tocilizumab'/exp OR 'fresolimumab'/exp) AND ('lung diffusion capacity'/exp OR 'forced vital capacity'/exp OR 'high resolution computer tomography') AND (2015:py OR 2016:py OR 2017:py OR 2018:py OR 2019:py) AND [embase]/lim NOT ([embase]/lim AND [medline]/lim)

**CENTRAL:**

## "systemic sclerosis" in Title Abstract Keyword AND "interstitial lung disease"
